# Supplementary material
Source: PubMed Central journal article supplement (PMC196918)
Supplement: pnas_100_19_11013__1.pdf [file pnas_100_19_11013__1.pdf]

**Table 6. Anti-HIV-1 activity of BMS-378806 against 83 clinical isolates from different envelope subtypes**

| HIV-1      | Group | Subtype | Coreceptor Usage | NSI/SI | Country | EC <sub>50</sub> *, nM |        |      |
|------------|-------|---------|------------------|--------|---------|------------------------|--------|------|
|            |       |         |                  |        |         | Mean                   | SD     |      |
| 92RW026    | M     | A       | R5               | NSI    | Rwanda  | 51.3                   | 9.7    |      |
| 94UG103    |       |         |                  |        | Uganda  | 466                    | 24     |      |
| 93RW020    |       |         |                  |        | Rwanda  | 1,132                  | 121    |      |
| 92UG029    |       |         |                  | SI     | Uganda  | 2,010                  | 171    |      |
| 92UG031    |       |         |                  | R5     | NSI     | Uganda                 | >5,000 |      |
| 93USBMS002 |       |         | B                | R5     |         | USA                    | 1      | 1    |
| ASM44      |       |         |                  | R5/X4  |         | USA                    | 1.5    | 0.1  |
| 93BR023    |       |         |                  |        |         | Brazil                 | 2.3    | 0.8  |
| 28MDR      |       |         |                  |        |         | USA                    | <2.7   |      |
| 93USBMS003 |       |         |                  | R5     |         | USA                    | 3.5    | 0.04 |
| 93US157    |       |         |                  |        | NSI     | USA                    | 3.9    | 1.8  |
| 01USBMS028 |       |         |                  |        |         | USA                    | 4.7    | 0.9  |
| 93US159    |       |         |                  | R5     | NSI     | USA                    | 5.9    | 0.1  |
| 93US149    |       |         |                  | R5     | NSI     | USA                    | 11.4   | 6.8  |
| 93US140    |       |         |                  |        | NSI     | USA                    | 11.9   | 4.9  |
| 93BR013    |       |         |                  |        |         | Brazil                 | 12.4   | 5.3  |
| 00USBMS023 |       |         |                  |        |         | USA                    | 18     | 5.3  |
| ASM57      |       |         |                  | R5     | NSI     | USA                    | 18.6   | 6.6  |
| 00USBMS024 |       |         |                  |        |         | USA                    | 24     | 0.3  |
| ASM34      |       |         |                  | R5     |         | USA                    | 24.4   | 0.3  |
| 92BR030    |       |         |                  | R5     |         | Brazil                 | 26     | 12   |
| 93USBMS001 |       |         |                  | X4     |         | USA                    | 35.8   | 5.1  |
| 91USBMS003 |       |         |                  |        | NSI     | USA                    | 39.8   | 12.1 |
| 92US657    |       |         |                  | R5     | NSI     | USA                    | 43.1   | 22.2 |
| 00USBMS025 |       |         |                  |        |         | USA                    | 60.5   | 22.9 |
| 92BR014    |       |         |                  | R5X4   |         | Brazil                 | 61     | 2    |
| 93US075    |       |         |                  | R5     | NSI     | USA                    | 61.9   | 33.9 |
| 91US054    |       |         |                  |        | SI      | USA                    | 70.1   | 1.5  |
| 00USBMS020 |       |         |                  | R5X4   |         | USA                    | 113    | 37   |
| 92US073    |       |         |                  | R5     | NSI     | USA                    | 129    | 57   |
| 92US056    |       |         |                  | R5     | NSI     | USA                    | 165    | 15   |
| 93US143    |       |         |                  | SI     | USA     | 166                    | 7      |      |
| 92HT593    |       | R5X4    |                  | SI     | Haiti   | 188                    | 11     |      |
| 411-1-C    |       |         |                  | NSI    | USA     | 193                    | 2      |      |
| 92US715    |       | R5      |                  | NSI    | USA     | >200                   |        |      |
| 92HT599    |       |         | SI               | Haiti  | 270     | 146                    |        |      |
| 92US072    |       |         | NSI              | USA    | 336     | 48                     |        |      |
| ME46       |       | R5X4    |                  | USA    | 545     | 92                     |        |      |
| QZ4589     |       | R5      |                  | USA    | 552     | 28                     |        |      |
| 91US005    |       |         | NSI              | USA    | 793     | 274                    |        |      |
| 93US141    |       |         | NSI              | USA    | >800    |                        |        |      |
| 92US660    |       |         | NSI              | USA    | 1,076   | 363                    |        |      |
| 92US076    |       |         | SI               | USA    | 1,133   | 506                    |        |      |
| 00USBMS026 |       |         |                  | USA    | >2,000  |                        |        |      |

| HIV-1      | Group | Subtype | Coreceptor Usage | NSI/SI | Country  | EC <sub>50</sub> *, nM |          |        |      |
|------------|-------|---------|------------------|--------|----------|------------------------|----------|--------|------|
|            |       |         |                  |        |          | Mean                   | SD       |        |      |
| 91USBMS004 | M     | B       |                  | SI     | USA      | >5,000                 |          |        |      |
| W0         |       |         |                  | NSI    | USA      | ≥5,914                 |          |        |      |
| ME1        |       |         | R5               |        | USA      | >10,000                |          |        |      |
| 99ZABMS016 |       | C       |                  |        |          | S. Africa              | 11.8     | 6.6    |      |
| 99ZABMS014 |       |         |                  |        |          | S. Africa              | 16.2     | 0.8    |      |
| 99ZABMS019 |       |         |                  |        |          | S. Africa              | 39.5     | 19     |      |
| 99ZABMS020 |       |         |                  |        |          | S. Africa              | 79.5     | 39     |      |
| 99ZABMS017 |       |         |                  |        |          | S. Africa              | 81.5     | 24     |      |
| 99ZABMS015 |       |         |                  |        |          | S. Africa              | 220      | 96     |      |
| 98BR004    |       |         |                  |        |          | Brazil                 | 266      | 121    |      |
| 93MW959    |       |         | R5               | NSI    |          | Malawi                 | 319      | 203    |      |
| 98CN006    |       |         |                  | SI     |          | China                  | 355      | 282    |      |
| 98IN101    |       |         | R5               | NSI    |          | India                  | 624      | 41     |      |
| 98MW959    |       |         | R5               | NSI    |          | Malawi                 | 638      | 347    |      |
| 99ZABMS018 |       |         |                  |        |          | S. Africa              | 749      | 124    |      |
| 94UG114    |       |         | D                |        |          | NSI                    | Uganda   | 45.8   | 25.1 |
| 93UG065    |       |         |                  | X4     | SI       |                        | Uganda   | 76.6   | 2.4  |
| 93UG067    |       |         |                  | R5X4   | SI       |                        | Uganda   | 367    | 88   |
| 94UG105    |       |         |                  | SI     |          | Uganda                 | 688      | 242    |      |
| 94UG117    |       |         |                  | SI     |          | Uganda                 | >2,000   |        |      |
| 93UG024    |       | X4      |                  | SI     |          | Uganda                 | >2,000   |        |      |
| 93UG070    |       | R5X4    |                  |        |          | Uganda                 | 2,128    | 1,211  |      |
| 94UG108    |       | R5      |                  | NSI    |          | Uganda                 | 2,238    | 654    |      |
| 93UG059    |       | X4      |                  |        |          | Uganda                 | 7,188    | 85     |      |
| 93UG086    |       | R5X4    |                  |        |          | Uganda                 | >10,000  |        |      |
| 92TH009    |       | E       |                  | R5     | NSI      |                        | Thailand | >2,000 |      |
| CMU06      |       |         |                  |        | SI       |                        | Thailand | >2,000 |      |
| CMU10      |       |         |                  | NSI    |          | Thailand               | >2,000   |        |      |
| 92TH020    |       |         |                  | NSI    |          | Thailand               | >2,000   |        |      |
| 92TH019    |       |         | R5               | NSI    |          | Thailand               | >5,000   |        |      |
| 02TH051    | R5X4  |         |                  |        | Thailand | >10,000                |          |        |      |
| 92BR029    | F     | R5      | NSI              |        | Brazil   | 214                    | 51       |        |      |
| 93BR020    |       | R5X4    |                  |        | Brazil   | >2,000                 |          |        |      |
| 93BR019    |       | R5      | NSI              |        | Brazil   | >5,000                 |          |        |      |
| JV1083     | G     |         |                  | NSI    | Nigeria  | >2,000                 |          |        |      |
| RU570      |       | R5      | NSI              |        | Russia   | >2,000                 |          |        |      |
| RU132      |       | R5      | NSI              |        | Russia   | 4,290                  | 1,120    |        |      |
| BCF01      | O     |         | R5               | NSI    | Cameroon | >2,000                 |          |        |      |
| BCF03      |       |         | R5               | NSI    | Cameroon | >2,000                 |          |        |      |

NSI, Non-syncytium-inducing; SI, syncytium-inducing.

\*Antiviral end point: p24. All results were based on two to four replicates. SD, standard deviation.
